# Supplementary material for: Three-dimensional reconstruction for determining positional indications of pulmonary segmentectomy/subsegmentectomy for ground glass opacity-dominant clinical T1a-bN0 non-small cell lung cancer
Source: PubMed Central journal article supplement — Transl Lung Cancer Res. 2024 Nov 28;13(11):2947–57. doi: 10.21037/tlcr-24-595 (PMC11632417; doi:10.21037/tlcr-24-595), 2024-11-28
Supplement: tlcr-13-11-2947-dss.pdf [file tlcr-13-11-2947-dss.pdf]

## Data Sharing Statement

|                     |                                                                                                                                                     |                                                                                                                                                                                                                                |
|---------------------|-----------------------------------------------------------------------------------------------------------------------------------------------------|--------------------------------------------------------------------------------------------------------------------------------------------------------------------------------------------------------------------------------|
| <b>Article Info</b> | <a href="https://dx.doi.org/10.21037/tlcr-24-595">https://dx.doi.org/10.21037/tlcr-24-595</a>                                                       |                                                                                                                                                                                                                                |
| <b>Item</b>         | <b>Question</b>                                                                                                                                     | <b>Authors' Response<br/>(place "-" if not applicable)</b>                                                                                                                                                                     |
| 1                   | Would you like to share data collected for your study to others?                                                                                    | YES                                                                                                                                                                                                                            |
| 2                   | If not, would you like to share the reason for your decision?                                                                                       | -                                                                                                                                                                                                                              |
| 3                   | What data in particular will be shared?                                                                                                             | Primarily, the demographic and clinical characteristics, as well as operative and pathological details, will be shared. Other information requested related with the study will be considered under appropriate justification. |
| 4                   | Any other documents will be shared? Such as study protocol, statistical analysis plan, informed consent form, clinical study report, analytic code. | Statistical analysis plan will be shared if requested.                                                                                                                                                                         |
| 5                   | When will data availability begin?                                                                                                                  | From the publication date.                                                                                                                                                                                                     |
| 6                   | When will data availability end?                                                                                                                    | Two years within the publication date, since the technique may be updated overtime.                                                                                                                                            |
| 7                   | To whom will you share the data?                                                                                                                    | Medical oncologists and Thoracic surgeons who are interested in studies of segmentectomy and subsegmentectomy.                                                                                                                 |
| 8                   | For what type of analysis or purpose?                                                                                                               | For analysis to evaluate the positional indications of pulmonary segmentectomy/subsegmentectomy for GGO-dominant cT1a-bN0 NSCLC                                                                                                |
| 9                   | How or where can the data/documents be obtained?                                                                                                    | Emails could be sent to the address below to Obtain the shared data: 13851124589@163.com.                                                                                                                                      |
| 10                  | Any other restrictions?                                                                                                                             | We may balance the potential benefits and risks for each request and then provide the data that could be shared.                                                                                                               |
