# Supplementary material for: Three-dimensional reconstruction for determining positional indications of pulmonary segmentectomy/subsegmentectomy for ground glass opacity-dominant clinical T1a-bN0 non-small cell lung cancer
Source: PubMed Central journal article supplement — Transl Lung Cancer Res. 2024 Nov 28;13(11):2947–57. doi: 10.21037/tlcr-24-595 (PMC11632417; doi:10.21037/tlcr-24-595), 2024-11-28
Supplement: tlcr-13-11-2947-rc.pdf [file tlcr-13-11-2947-rc.pdf]

## STROBE Statement—checklist of items that should be included in reports of observational studies

| Section/item                 | Item No | Recommendation                                                                                                                                                                                                                                                                                                                                                                                                                                                         | Reported on Page Number/Line Number | Reported on Section/Paragraph                                         |
|------------------------------|---------|------------------------------------------------------------------------------------------------------------------------------------------------------------------------------------------------------------------------------------------------------------------------------------------------------------------------------------------------------------------------------------------------------------------------------------------------------------------------|-------------------------------------|-----------------------------------------------------------------------|
| Title and abstract           | 1       | (a) Indicate the study's design with a commonly used term in the title or the abstract                                                                                                                                                                                                                                                                                                                                                                                 | P1/L1;P2/L42                        | Title;Abstract/ Methods                                               |
|                              |         | (b) Provide in the abstract an informative and balanced summary of what was done and what was found                                                                                                                                                                                                                                                                                                                                                                    | P2/L57                              | Abstract/Conclusions                                                  |
| <b>Introduction</b>          |         |                                                                                                                                                                                                                                                                                                                                                                                                                                                                        |                                     |                                                                       |
| Background/<br>rationale     | 2       | Explain the scientific background and rationale for the investigation being reported                                                                                                                                                                                                                                                                                                                                                                                   | P3/L89;P4/L94,101                   | Introduction/Paragraph1-3                                             |
| Objectives                   | 3       | State specific objectives, including any prespecified hypotheses                                                                                                                                                                                                                                                                                                                                                                                                       | P4/L108                             | Introduction/Paragraph4                                               |
| <b>Methods</b>               |         |                                                                                                                                                                                                                                                                                                                                                                                                                                                                        |                                     |                                                                       |
| Study design                 | 4       | Present key elements of study design early in the paper                                                                                                                                                                                                                                                                                                                                                                                                                | P4/L120                             | Study cohort/Paragraph2                                               |
| Setting                      | 5       | Describe the setting, locations, and relevant dates, including periods of recruitment, exposure, follow-up, and data collection                                                                                                                                                                                                                                                                                                                                        | P4/L120                             | Study cohort/Paragraph2                                               |
| Participants                 | 6       | (a) <b>Cohort study</b> —Give the eligibility criteria, and the sources and methods of selection of participants. Describe methods of follow-up<br><b>Case-control study</b> —Give the eligibility criteria, and the sources and methods of case ascertainment and control selection. Give the rationale for the choice of cases and controls<br><b>Cross-sectional study</b> —Give the eligibility criteria, and the sources and methods of selection of participants | P4/L124;P5/L127                     | Study cohort/Paragraph3,4                                             |
|                              |         | (b) <b>Cohort study</b> —For matched studies, give matching criteria and number of exposed and unexposed<br><b>Case-control study</b> —For matched studies, give matching criteria and the number of controls per case                                                                                                                                                                                                                                                 | P4/L124;P5/L127                     | Study cohort/Paragraph3,4                                             |
| Variables                    | 7       | Clearly define all outcomes, exposures, predictors, potential confounders, and effect modifiers. Give diagnostic criteria, if applicable                                                                                                                                                                                                                                                                                                                               | P5/L131                             | Perioperative Preparations and Intraoperative Procedures              |
| Data sources/<br>measurement | 8*      | For each variable of interest, give sources of data and details of methods of assessment (measurement). Describe comparability of assessment methods if there is more than one group                                                                                                                                                                                                                                                                                   | P5/L132,136                         | Perioperative Preparations and Intraoperative Procedures/Paragraph1,2 |
| Bias                         | 9       | Describe any efforts to address potential sources of bias                                                                                                                                                                                                                                                                                                                                                                                                              | P5/L141                             | Perioperative Preparations and Intraoperative Procedures/Paragraph2   |
| Study size                   | 10      | Explain how the study size was arrived at                                                                                                                                                                                                                                                                                                                                                                                                                              | P4/L120                             | Study cohort/Paragraph2                                               |
| Quantitative variables       | 11      | Explain how quantitative variables were handled in the analyses. If applicable, describe which groupings were chosen and why                                                                                                                                                                                                                                                                                                                                           | P5/L142                             | Perioperative Preparations and Intraoperative Procedures/Paragraph2   |

|                     |     |                                                                                                                                                                                                                                                                                                           |                            |                                                                                                |
|---------------------|-----|-----------------------------------------------------------------------------------------------------------------------------------------------------------------------------------------------------------------------------------------------------------------------------------------------------------|----------------------------|------------------------------------------------------------------------------------------------|
| Statistical methods | 12  | (a) Describe all statistical methods, including those used to control for confounding                                                                                                                                                                                                                     | P6/L158                    | Statistical analysis                                                                           |
|                     |     | (b) Describe any methods used to examine subgroups and interactions                                                                                                                                                                                                                                       | P6/L158                    | Statistical analysis                                                                           |
|                     |     | (c) Explain how missing data were addressed                                                                                                                                                                                                                                                               | P6/L158                    | Statistical analysis                                                                           |
|                     |     | (d) <b>Cohort study</b> —If applicable, explain how loss to follow-up was addressed<br><b>Case-control study</b> —If applicable, explain how matching of cases and controls was addressed<br><b>Cross-sectional study</b> —If applicable, describe analytical methods taking account of sampling strategy | P6/L158                    | Statistical analysis                                                                           |
|                     |     | (e) Describe any sensitivity analyses                                                                                                                                                                                                                                                                     | P6/L158                    | Statistical analysis                                                                           |
| <b>Results</b>      |     |                                                                                                                                                                                                                                                                                                           |                            |                                                                                                |
| Participants        | 13* | (a) Report numbers of individuals at each stage of study—eg numbers potentially eligible, examined for eligibility, confirmed eligible, included in the study, completing follow-up, and analysed                                                                                                         | P6/L169                    | Patients and Clinical Characteristics of the Study Cohort/Paragraph1                           |
|                     |     | (b) Give reasons for non-participation at each stage                                                                                                                                                                                                                                                      | P6/L170                    | Patients and Clinical Characteristics of the Study Cohort/Figure 1                             |
|                     |     | (c) Consider use of a flow diagram                                                                                                                                                                                                                                                                        | P6/L170                    | Patients and Clinical Characteristics of the Study Cohort/Figure 1                             |
| Descriptive data    | 14* | (a) Give characteristics of study participants (eg demographic, clinical, social) and information on exposures and potential confounders                                                                                                                                                                  | P6/L171                    | Patients and Clinical Characteristics of the Study Cohort/Table1                               |
|                     |     | (b) Indicate number of participants with missing data for each variable of interest                                                                                                                                                                                                                       | P6/L171                    | Patients and Clinical Characteristics of the Study Cohort/Table 1                              |
|                     |     | (c) <b>Cohort study</b> —Summarise follow-up time (eg, average and total amount)                                                                                                                                                                                                                          | P6/L171                    | Patients and Clinical Characteristics of the Study Cohort/Table 1                              |
| Outcome data        | 15* | <b>Cohort study</b> —Report numbers of outcome events or summary measures over time                                                                                                                                                                                                                       | P7/L185,208                | Postoperative clinical data/Subanalysis of the surgical margin and resected subsegments number |
|                     |     | <b>Case-control study</b> —Report numbers in each exposure category, or summary measures of exposure                                                                                                                                                                                                      | Retrospective Cohort Study | Retrospective Cohort Study                                                                     |
|                     |     | <b>Cross-sectional study</b> —Report numbers of outcome events or summary measures                                                                                                                                                                                                                        | Retrospective Cohort Study | Retrospective Cohort Study                                                                     |
| Main results        | 16  | (a) Give unadjusted estimates and, if applicable, confounder-adjusted estimates and their precision (eg, 95% confidence interval). Make clear which confounders were adjusted for and why they were included                                                                                              | P7/L191                    | Postoperative clinical data/ Paragraph2                                                        |
|                     |     | (b) Report category boundaries when continuous variables were categorized                                                                                                                                                                                                                                 | P7/L191                    | Postoperative clinical data/ Paragraph2                                                        |
|                     |     | (c) If relevant, consider translating estimates of relative risk into absolute risk for a meaningful time period                                                                                                                                                                                          | P7/L191                    | Postoperative clinical data/ Paragraph2                                                        |
| Other analyses      | 17  | Report other analyses done—eg analyses of subgroups and interactions, and sensitivity analyses                                                                                                                                                                                                            | P7/L208                    | Subanalysis of the surgical margin and resected subsegments number                             |
| <b>Discussion</b>   |     |                                                                                                                                                                                                                                                                                                           |                            |                                                                                                |
| Key results         | 18  | Summarise key results with reference to study objectives                                                                                                                                                                                                                                                  | P10/L287                   | CONCLUSION                                                                                     |
| Limitations         | 19  | Discuss limitations of the study, taking into account sources of potential bias or imprecision. Discuss both direction and magnitude of any potential bias                                                                                                                                                | P9/L279                    | DISCUSSION/Paragraph5                                                                          |

|                          |    |                                                                                                                                                                            |          |                          |
|--------------------------|----|----------------------------------------------------------------------------------------------------------------------------------------------------------------------------|----------|--------------------------|
| Interpretation           | 20 | Give a cautious overall interpretation of results considering objectives, limitations, multiplicity of analyses, results from similar studies, and other relevant evidence | P7/L215  | DISCUSSION/Paragraph1    |
| Generalisability         | 21 | Discuss the generalisability (external validity) of the study results                                                                                                      | P9/L264  | DISCUSSION/Paragraph4    |
| <b>Other information</b> |    |                                                                                                                                                                            |          |                          |
| Funding                  | 22 | Give the source of funding and the role of the funders for the present study and, if applicable, for the original study on which the present article is based              | P10/L299 | ACKNOWLEDGMENTS /Funding |

\*Give information separately for cases and controls in case-control studies and, if applicable, for exposed and unexposed groups in cohort and cross-sectional studies.

**Note:** An Explanation and Elaboration article discusses each checklist item and gives methodological background and published examples of transparent reporting. The STROBE checklist is best used in conjunction with this article (freely available on the Web sites of PLoS Medicine at <http://www.plosmedicine.org/>, Annals of Internal Medicine at <http://www.annals.org/>, and Epidemiology at <http://www.epidem.com/>). Information on the STROBE Initiative is available at [www.strobe-statement.org](http://www.strobe-statement.org).
